# Supplementary material for: Comparing the performance of dengue virus IgG and IgG-capture enzyme-linked immunosorbent assays in seroprevalence study
Source: Springer Nature journal article supplement (doi:10.1186/s12879-023-08307-8), 2023-05-08
Supplement: MOESM1 [file 25332094]

**Table S1** NT<sub>90</sub> titers and sampling time of samples from different panels

| Panels <sup>a</sup>       | Sampling time <sup>b</sup> | ID     | NT <sub>90</sub> titers <sup>c</sup> |       |     |     |    |
|---------------------------|----------------------------|--------|--------------------------------------|-------|-----|-----|----|
|                           |                            |        | D1                                   | D2    | D3  | D4  | ZK |
| Seroprevalence study (32) |                            |        |                                      |       |     |     |    |
| pDENV                     | unknown                    | S020   | >40                                  | <10   | <10 | <10 | ND |
| pDENV                     | unknown                    | S087   | <10                                  | >40   | <10 | <10 | ND |
| pDENV                     | unknown                    | S016   | <10                                  | 10–40 | <10 | <10 | ND |
| pDENV                     | unknown                    | S019   | <10                                  | 10–40 | <10 | <10 | ND |
| pDENV                     | unknown                    | S025   | <10                                  | >40   | <10 | <10 | ND |
| pDENV                     | unknown                    | S047   | <10                                  | 10–40 | <10 | <10 | ND |
| pDENV                     | unknown                    | S065   | >40                                  | <10   | <10 | <10 | ND |
| pDENV                     | unknown                    | S017   | <10                                  | >40   | <10 | <10 | ND |
| pDENV                     | 6 M                        | S190-1 | <10                                  | >40   | <10 | <10 | ND |
| pDENV                     | 6 M                        | S298   | 10–40                                | >40   | <10 | <10 | ND |
| pDENV                     | 13 M                       | S386   | <10                                  | 10–40 | <10 | <10 | ND |
| pDENV                     | 16 M                       | S281   | >40                                  | <10   | <10 | <10 | ND |
| pDENV                     | 36 M                       | S425   | >40                                  | <10   | <10 | <10 | ND |
| pDENV                     | 20 Y                       | S037   | >40                                  | <10   | <10 | <10 | ND |
| pDENV                     | 26 Y                       | N446   | >40                                  | <10   | <10 | <10 | ND |
| pDENV                     | 26 Y                       | N451   | >40                                  | <10   | <10 | <10 | ND |
| pDENV                     | 27 Y                       | S287   | >40                                  | <10   | <10 | <10 | ND |
| pDENV                     | 29 Y                       | S433   | >40                                  | <10   | <10 | <10 | ND |
| pDENV                     | 30 Y                       | S049   | >40                                  | <10   | <10 | <10 | ND |
| pDENV                     | 31 Y                       | S213   | >40                                  | <10   | <10 | <10 | ND |
| sDENV                     | unknown                    | S034   | 10–40                                | 10–40 | ND  | ND  | ND |
| sDENV                     | unknown                    | S035   | >40                                  | 10–40 | ND  | ND  | ND |
| sDENV                     | unknown                    | S053   | >40                                  | >40   | ND  | ND  | ND |
| sDENV                     | unknown                    | S055   | >40                                  | 10–40 | ND  | ND  | ND |
| sDENV                     | unknown                    | S038   | >40                                  | >40   | ND  | ND  | ND |
| sDENV                     | unknown                    | S059   | 10–40                                | >40   | ND  | ND  | ND |
| sDENV                     | unknown                    | S069   | 10–40                                | >40   | ND  | ND  | ND |
| sDENV                     | unknown                    | S075   | >40                                  | >40   | ND  | ND  | ND |
| sDENV                     | unknown                    | S063   | 1801                                 | 3963  | ND  | ND  | ND |
| sDENV                     | unknown                    | S285   | 151                                  | 4571  | ND  | ND  | ND |
| sDENV                     | unknown                    | S289   | 10–40                                | >40   | ND  | ND  | ND |
| sDENV                     | unknown                    | S264   | >40                                  | >40   | ND  | ND  | ND |
| sDENV                     | unknown                    | S080   | >40                                  | 10–40 | ND  | ND  | ND |
| sDENV                     | 3 d                        | S008   | >40                                  | >40   | ND  | ND  | ND |
| sDENV                     | 7 d                        | S006   | 10–40                                | >40   | ND  | ND  | ND |
| sDENV                     | 1 M                        | S114   | 10–40                                | >40   | ND  | ND  | ND |
| sDENV                     | 4 M                        | S028   | >40                                  | >40   | ND  | ND  | ND |
| sDENV                     | 1 Y                        | S044   | >40                                  | >40   | ND  | ND  | ND |

|                 |         |        |       |       |      |       |      |
|-----------------|---------|--------|-------|-------|------|-------|------|
| sDENV           | 1 Y     | S066   | >40   | >40   | ND   | ND    | ND   |
| sDENV           | 1 Y     | S089   | >40   | >40   | ND   | ND    | ND   |
| sDENV           | 13 M    | S368   | 10-40 | <10   | ND   | ND    | ND   |
| sDENV           | 16 M    | S217   | >40   | 10-40 | ND   | ND    | ND   |
| sDENV           | 17 M    | N258   | >40   | 10-40 | ND   | ND    | ND   |
| sDENV           | 2 Y     | S473   | >40   | 10-40 | ND   | ND    | ND   |
| sDENV           | 2 Y     | NH055  | 10-40 | >40   | ND   | ND    | ND   |
| sDENV           | 3 Y     | NH015  | >40   | 10-40 | ND   | ND    | ND   |
| sDENV           | 10 Y    | S100   | >40   | >40   | ND   | ND    | ND   |
| sDENV           | 13 Y    | N197   | >40   | >40   | ND   | ND    | ND   |
| sDENV           | 15 Y    | N438   | >40   | 10-40 | ND   | ND    | ND   |
| sDENV           | 20 Y    | NH029  | 10-40 | 10-40 | ND   | ND    | ND   |
| sDENV           | 23 Y    | N229   | >40   | 10-40 | ND   | ND    | ND   |
| sDENV           | 24 Y    | NH003  | >40   | 10-40 | ND   | ND    | ND   |
| sDENV           | 25 Y    | S051   | >40   | 10-40 | ND   | ND    | ND   |
| sDENV           | 25 Y    | N040   | >40   | 10-40 | ND   | ND    | ND   |
| sDENV           | 26 Y    | S444   | >40   | 10-40 | ND   | ND    | ND   |
| sDENV           | 28 Y    | S370   | >40   | 10-40 | ND   | ND    | ND   |
| sDENV           | 29 Y    | N406   | >40   | 10-40 | ND   | ND    | ND   |
| sDENV           | 29 Y    | NH005  | >40   | 10-40 | ND   | ND    | ND   |
| sDENV           | 30 Y    | NH064  | >40   | 10-40 | ND   | ND    | ND   |
| <hr/>           |         |        |       |       |      |       |      |
| ZIKV study (34) |         |        |       |       |      |       |      |
| <hr/>           |         |        |       |       |      |       |      |
| pZIKV           | 5-11 M  | ZK0979 | <10   | <10   | <10  | <10   | >160 |
| pZIKV           | 5-11 M  | ZK0993 | <40   | <40   | <10  | <10   | >160 |
| pZIKV           | 5-11 M  | ZK0998 | <10   | <10   | <40  | <10   | >160 |
| pZIKV           | 5-11 M  | ZL1006 | <80   | <40   | <10  | <40   | 640  |
| pZIKV           | 5-11 M  | ZK0996 | <10   | <10   | <10  | <10   | >160 |
| <hr/>           |         |        |       |       |      |       |      |
| pDENV           | unknown | ZK0966 | <40   | 160   | <10  | <40   | <10  |
| pDENV           | unknown | ZK0980 | <40   | <40   | >160 | <40   | <10  |
| pDENV           | unknown | ZK0995 | >640  | 160   | <10  | <10   | <10  |
| pDENV           | unknown | ZK0997 | <40   | >160  | <40  | <40   | <10  |
| <hr/>           |         |        |       |       |      |       |      |
| ZIKVwpDENV      | 5-11 M  | ZK0972 | >40   | ND    | ND   | ND    | >80  |
| ZIKVwpDENV      | 5-11 M  | ZK0975 | >40   | ND    | ND   | ND    | >80  |
| ZIKVwpDENV      | 5-11 M  | ZK0989 | >40   | ND    | ND   | ND    | >80  |
| ZIKVwpDENV      | 5-11 M  | ZK0991 | >40   | ND    | ND   | ND    | >80  |
| ZIKVwpDENV      | 5-11 M  | ZK1000 | >40   | ND    | ND   | ND    | >40  |
| ZIKVwpDENV      | 5-11 M  | ZK1009 | >10   | ND    | ND   | ND    | >80  |
| ZIKVwpDENV      | 5-11 M  | ZK1011 | >40   | ND    | ND   | ND    | >80  |
| ZIKVwpDENV      | 5-11 M  | ZK1012 | >40   | ND    | ND   | ND    | >80  |
| ZIKVwpDENV      | 5-11 M  | ZK1014 | >40   | ND    | ND   | ND    | >80  |
| ZIKVwpDENV      | 5-11 M  | ZK1015 | >40   | ND    | ND   | ND    | >80  |
| ZIKVwpDENV      | 5-11 M  | ZK0968 | >40   | ND    | ND   | ND    | >80  |
| ZIKVwpDENV      | 5-11 M  | ZK0984 | >320  | >1280 | <80  | >1280 | >320 |

|       |         |        |     |       |       |    |      |
|-------|---------|--------|-----|-------|-------|----|------|
| sDENV | unknown | ZK0976 | >40 | ND    | ND    | ND | <10  |
| sDENV | unknown | ZK0986 | >40 | ND    | ND    | ND | >80  |
| sDENV | unknown | ZK0967 | >40 | ND    | ND    | ND | >80  |
| sDENV | unknown | ZK0969 | >40 | ND    | ND    | ND | >40  |
| sDENV | unknown | ZK0971 | >40 | >40   | ND    | ND | <10  |
| sDENV | unknown | ZK0977 | >40 | ND    | ND    | ND | >80  |
| sDENV | unknown | ZK0983 | >40 | ND    | ND    | ND | >10  |
| sDENV | unknown | ZL0985 | >40 | ND    | ND    | ND | >40  |
| sDENV | unknown | ZK0988 | >40 | ND    | ND    | ND | >40  |
| sDENV | unknown | ZK0992 | >40 | ND    | ND    | ND | >80  |
| sDENV | unknown | ZK0994 | >40 | ND    | ND    | ND | >40  |
| sDENV | unknown | ZK1001 | >40 | ND    | ND    | ND | <10  |
| sDENV | unknown | ZK1010 | >40 | ND    | ND    | ND | >80  |
| sDENV | unknown | ZK1013 | >40 | ND    | ND    | ND | >10  |
| sDENV | unknown | ZK0973 | >40 | <80   | >80   | ND | >320 |
| sDENV | unknown | ZK0974 | >40 | >320  | >80   | ND | >10  |
| sDENV | unknown | ZK1002 | >40 | >80   | <80   | ND | <10  |
| sDENV | unknown | ZK1003 | >40 | >80   | <80   | ND | <10  |
| sDENV | unknown | ZK1007 | >40 | >80   | >80   | ND | <10  |
| sDENV | unknown | ZK1016 | >40 | >1280 | >1280 | ND | >10  |
| sDENV | unknown | ZK0990 | >40 | >1280 | >80   | ND | <10  |

<sup>a</sup>pDENV, primary DENV infection; sDENV, secondary DENV infection; pZIKV, primary ZIKV infection; ZIKVwprDENV, ZIKV infection with previous DENV infection.

<sup>b</sup>Sampling time post symptom onset was based on questionnaire in each study.

<sup>c</sup>Microneutralization test as described previously [34]. D1, DENV1; D2, DENV2; D3, DENV3; D4, DENV4; ZK, ZIKV; ND, not done. For samples from the seroprevalence study in Kaohsiung, Taiwan [33], microneutralization test against D1 and D2, the two most common serotypes circulating locally, was performed first. If both were detectable, the samples were sDENV infection. If either D1 or D2 were detectable, microneutralization test against D3 and D4 was further performed to confirm pDENV infection. Microneutralization test against ZIKV (only imported cases in Taiwan) was not performed.

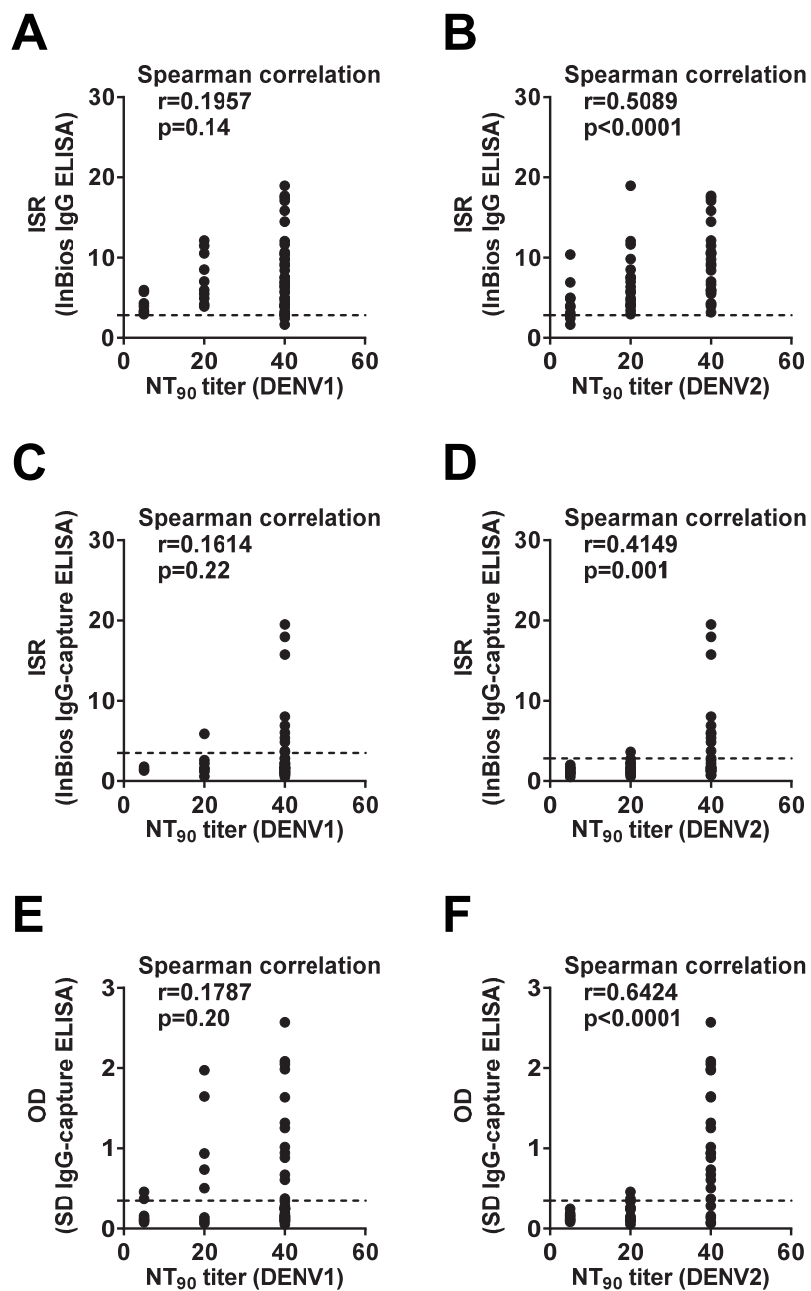

**FIG S1** Relationship between neutralization titers and ELISAs. NT<sub>90</sub> titers to DENV1 (A,C,E) and DENV2 (B,D,F) were plotted against the ISR of InBios IgG ELISA (A,B), ISR of InBios IgG-capture ELISA (C,D) and OD of SD IgG-capture ELISA (E,F). The two-tailed Spearman correlation test was performed with the correlation coefficient  $r$  and  $p$  values shown.

**A**

|                     |       | NT or RT-PCR |     |     |       |
|---------------------|-------|--------------|-----|-----|-------|
|                     |       | pos          | neg | equ | total |
| InBios<br>IgG ELISA | pos   | 150          | 26  | 0   | 176   |
|                     | neg   | 0            | 52  | 0   | 52    |
|                     | equ   | 3            | 1   | 0   | 4     |
|                     | total | 153          | 79  | 0   | 232   |

positive agreement=0.980 overall agreement=0.871  
negative agreement=0.658 kappa assessment=0.695

|                                |       | NT or RT-PCR |     |     |       |
|--------------------------------|-------|--------------|-----|-----|-------|
|                                |       | pos          | neg | equ | total |
| InBios<br>IgG-capture<br>ELISA | pos   | 71           | 16  | 0   | 87    |
|                                | neg   | 63           | 61  | 0   | 124   |
|                                | equ   | 19           | 2   | 0   | 21    |
|                                | total | 153          | 79  | 0   | 232   |

positive agreement=0.464 overall agreement=0.569  
negative agreement=0.772 kappa assessment=0.245

**B**

|                                |       | InBios IgG ELISA |     |     |       |
|--------------------------------|-------|------------------|-----|-----|-------|
|                                |       | pos              | neg | equ | total |
| InBios<br>IgG-capture<br>ELISA | pos   | 87               | 0   | 0   | 87    |
|                                | neg   | 68               | 52  | 4   | 124   |
|                                | equ   | 21               | 0   | 0   | 21    |
|                                | total | 176              | 52  | 4   | 232   |

positive agreement=0.494 overall agreement=0.610  
negative agreement=1.0 kappa assessment=0.325

**Fig. S2** Comparison of InBios IgG and InBios IgG-capture ELISAs. **A,B** The positive, negative, overall agreements and kappa assessment of the InBios IgG and InBios IgG-capture ELISAs based on NT or RT-PCR as the gold standard (A), and those of the InBios IgG-capture ELISA based on InBios IgG ELISA as the gold standard (B).

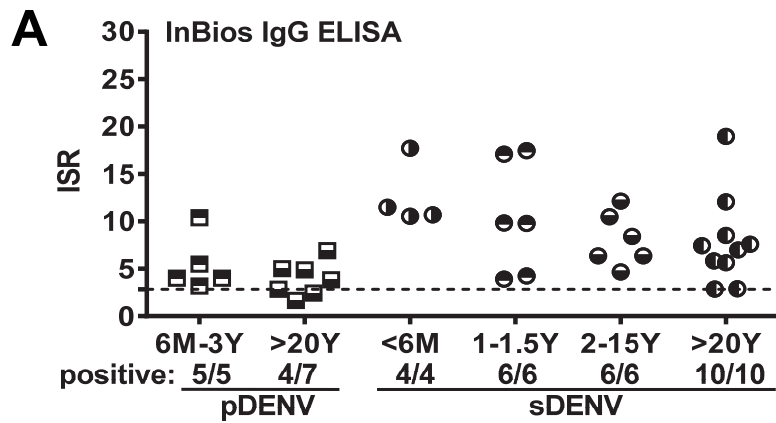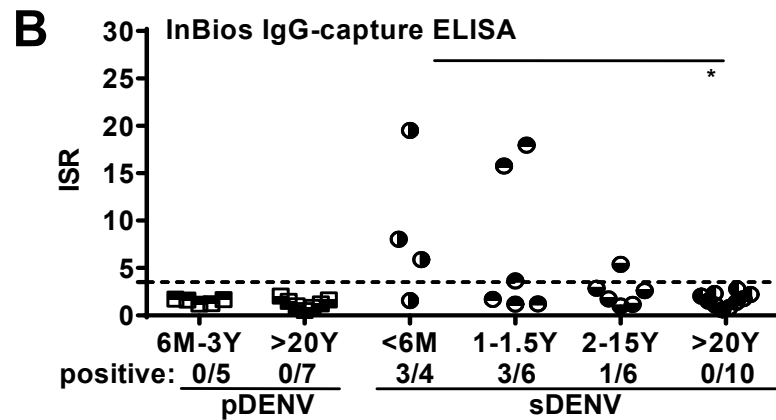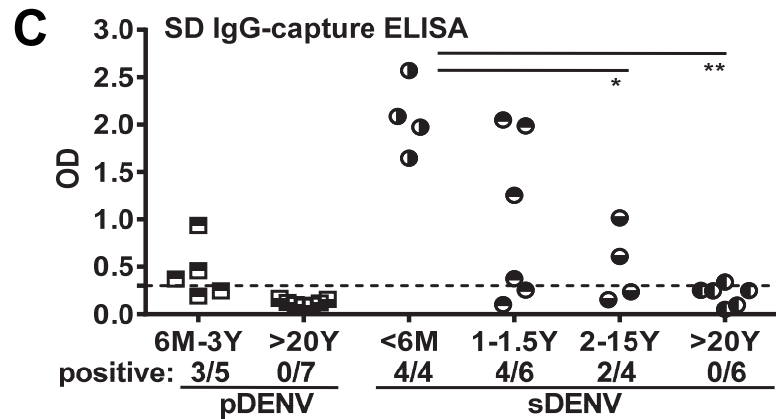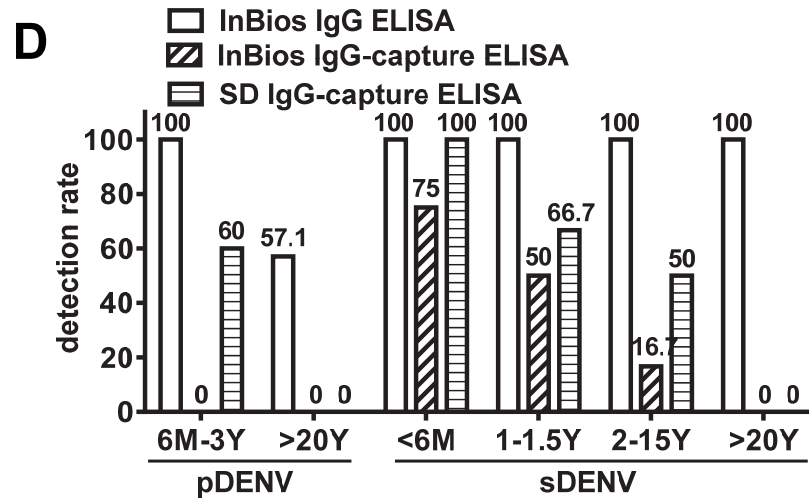

**Fig. S3** Relationship between detection rates of three DENV ELISAs and sampling time. **A–C** Results of InBios IgG (A), InBios IgG-capture (B) and SD IgG-capture (C) ELISAs tested with NT-confirmed pDENV and sDENV panels with known sampling time. Dash lines indicate cutoff ISR or OD. Data are mean of one experiment (in duplicate). The two-tailed Mann-Whitney test was used to compare two subgroups. \* $p < 0.05$  and  $\geq 0.01$ , \*\* $p < 0.01$  and  $\geq 0.001$ . **D** Detection rates of the three ELISAs at different sampling time for pDENV and sDENV panels. Number above each bar represents detection rate (%).

**A**

| pDENV <1Y              |       | NT or RT-PCR          |     |     |       |
|------------------------|-------|-----------------------|-----|-----|-------|
|                        |       | pos                   | neg | equ | total |
| InBios<br>IgG ELISA    | pos   | 18                    | 0   | 0   | 18    |
|                        | neg   | 0                     | 49  | 0   | 49    |
|                        | equ   | 0                     | 0   | 0   | 0     |
|                        | total | 18                    | 49  | 0   | 67    |
| positive agreement=1.0 |       | overall agreement=1.0 |     |     |       |
| negative agreement=1.0 |       | kappa assessment=1.0  |     |     |       |

| pDENV <1Y                      |       | NT or RT-PCR            |     |     |       |
|--------------------------------|-------|-------------------------|-----|-----|-------|
|                                |       | pos                     | neg | equ | total |
| InBios<br>IgG-capture<br>ELISA | pos   | 7                       | 0   | 0   | 7     |
|                                | neg   | 7                       | 49  | 0   | 56    |
|                                | equ   | 4                       | 0   | 0   | 4     |
|                                | total | 18                      | 49  | 0   | 67    |
| positive agreement=0.389       |       | overall agreement=0.836 |     |     |       |
| negative agreement=1.0         |       | kappa assessment=0.545  |     |     |       |

**C**

| sDENV <1.5Y            |       | NT or RT-PCR          |     |     |       |
|------------------------|-------|-----------------------|-----|-----|-------|
|                        |       | pos                   | neg | equ | total |
| InBios<br>IgG ELISA    | pos   | 30                    | 0   | 0   | 30    |
|                        | neg   | 0                     | 49  | 0   | 49    |
|                        | equ   | 0                     | 0   | 0   | 0     |
|                        | total | 30                    | 49  | 0   | 79    |
| positive agreement=1.0 |       | overall agreement=1.0 |     |     |       |
| negative agreement=1.0 |       | kappa assessment=1.0  |     |     |       |

| sDENV <1.5Y                    |       | NT or RT-PCR            |     |     |       |
|--------------------------------|-------|-------------------------|-----|-----|-------|
|                                |       | pos                     | neg | equ | total |
| InBios<br>IgG-capture<br>ELISA | pos   | 19                      | 0   | 0   | 19    |
|                                | neg   | 8                       | 49  | 0   | 57    |
|                                | equ   | 3                       | 0   | 0   | 3     |
|                                | total | 30                      | 49  | 0   | 79    |
| positive agreement=0.633       |       | overall agreement=0.861 |     |     |       |
| negative agreement=1.0         |       | kappa assessment=0.698  |     |     |       |

**B**

| pDENV ≥1Y               |       | NT or RT-PCR            |     |     |       |
|-------------------------|-------|-------------------------|-----|-----|-------|
|                         |       | pos                     | neg | equ | total |
| InBios<br>IgG ELISA     | pos   | 9                       | 0   | 0   | 9     |
|                         | neg   | 0                       | 49  | 0   | 49    |
|                         | equ   | 3                       | 0   | 0   | 3     |
|                         | total | 12                      | 49  | 0   | 61    |
| positive agreement=0.75 |       | overall agreement=0.951 |     |     |       |
| negative agreement=1.0  |       | kappa assessment=0.849  |     |     |       |

| pDENV ≥1Y                      |       | NT or RT-PCR            |     |     |       |
|--------------------------------|-------|-------------------------|-----|-----|-------|
|                                |       | pos                     | neg | equ | total |
| InBios<br>IgG-capture<br>ELISA | pos   | 0                       | 0   | 0   | 0     |
|                                | neg   | 10                      | 49  | 0   | 59    |
|                                | equ   | 2                       | 0   | 0   | 2     |
|                                | total | 12                      | 49  | 0   | 61    |
| positive agreement=NA          |       | overall agreement=0.803 |     |     |       |
| negative agreement=1.0         |       | kappa assessment=0.118  |     |     |       |

**D**

| sDENV ≥2Y              |       | NT or RT-PCR          |     |     |       |
|------------------------|-------|-----------------------|-----|-----|-------|
|                        |       | pos                   | neg | equ | total |
| InBios<br>IgG ELISA    | pos   | 24                    | 0   | 0   | 24    |
|                        | neg   | 0                     | 49  | 0   | 49    |
|                        | equ   | 0                     | 0   | 0   | 0     |
|                        | total | 24                    | 49  | 0   | 73    |
| positive agreement=1.0 |       | overall agreement=1.0 |     |     |       |
| negative agreement=1.0 |       | kappa assessment=1.0  |     |     |       |

| sDENV ≥2Y                      |       | NT or RT-PCR            |     |     |       |
|--------------------------------|-------|-------------------------|-----|-----|-------|
|                                |       | pos                     | neg | equ | total |
| InBios<br>IgG-capture<br>ELISA | pos   | 4                       | 0   | 0   | 4     |
|                                | neg   | 15                      | 49  | 0   | 64    |
|                                | equ   | 5                       | 0   | 0   | 5     |
|                                | total | 24                      | 49  | 0   | 73    |
| positive agreement=0.167       |       | overall agreement=0.726 |     |     |       |
| negative agreement=1.0         |       | kappa assessment=0.304  |     |     |       |

**FIG S4** Comparison of InBios IgG and InBios IgG-capture ELISAs at different sampling times in pDENV and sDENV panels. (A, B) pDENV panels <1 Y (A) and ≥1 Y (B). (C, D) sDENV panels <1.5 Y (C) and ≥2 Y (D). The positive, negative, overall agreements and kappa assessment of the InBios IgG (upper) and InBios IgG-capture (lower) ELISAs based on NT or RT-PCR as the gold standard. NA, not applicable
